# Supplementary material for: Presenting a strong and united front to tobacco industry interference : a content analysis of Australian newspaper coverage of tobacco plain packaging 2008–2014
Source: PubMed Central journal article supplement — BMJ Open. 2018 Sep 17;8(9):e023485. doi: 10.1136/bmjopen-2018-023485 (PMC6144411; doi:10.1136/bmjopen-2018-023485), 2018-09-17
Supplement: bmjopen-2018-023485.draft_revisions.pdf [file bmjopen-2018-023485.draft_revisions.pdf]

# BMJ Open

BMJ Open is committed to open peer review. As part of this commitment we make the peer review history of every article we publish publicly available.

When an article is published we post the peer reviewers' comments and the authors' responses online. We also post the versions of the paper that were used during peer review. These are the versions that the peer review comments apply to.

The versions of the paper that follow are the versions that were submitted during the peer review process. They are not the versions of record or the final published versions. They should not be cited or distributed as the published version of this manuscript.

BMJ Open is an open access journal and the full, final, typeset and author-corrected version of record of the manuscript is available on our site with no access controls, subscription charges or pay-per-view fees (<http://bmjopen.bmj.com>).

If you have any questions on BMJ Open's open peer review process please email [info.bmjopen@bmj.com](mailto:info.bmjopen@bmj.com)

# BMJ Open

## PRESENTING A STRONG AND UNITED FRONT TO TOBACCO INDUSTRY INTERFERENCE: A CONTENT ANALYSIS OF AUSTRALIAN NEWSPAPER COVERAGE OF TOBACCO PLAIN PACKAGING 2008-2014

|                               |                                                                                                                                                                                                                                                                                                                                                                                                                                                                                                                                                       |
|-------------------------------|-------------------------------------------------------------------------------------------------------------------------------------------------------------------------------------------------------------------------------------------------------------------------------------------------------------------------------------------------------------------------------------------------------------------------------------------------------------------------------------------------------------------------------------------------------|
| Journal:                      | <i>BMJ Open</i>                                                                                                                                                                                                                                                                                                                                                                                                                                                                                                                                       |
| Manuscript ID                 | bmjopen-2018-023485                                                                                                                                                                                                                                                                                                                                                                                                                                                                                                                                   |
| Article Type:                 | Research                                                                                                                                                                                                                                                                                                                                                                                                                                                                                                                                              |
| Date Submitted by the Author: | 12-Apr-2018                                                                                                                                                                                                                                                                                                                                                                                                                                                                                                                                           |
| Complete List of Authors:     | Miller, Caroline; University of Adelaide, School of Public Health; South Australian Health and Medical Research Institute, Population Health Research Group<br>Brownbill, Aimee; The University of Adelaide, School of Public Health; South Australian Health and Medical Research Institute, Population Health Research Group<br>Dono, Joanne; South Australian Health and Medical Research Institute, Population Health Research Group<br>Ettridge, Kerry; South Australian Health and Medical Research Institute, Population Health Research Group |
| Keywords:                     | tobacco, plain packaging, content analysis, print media                                                                                                                                                                                                                                                                                                                                                                                                                                                                                               |
|                               |                                                                                                                                                                                                                                                                                                                                                                                                                                                                                                                                                       |

SCHOLARONE™  
Manuscripts

1  
2  
3 ***PRESENTING A STRONG AND UNITED FRONT TO TOBACCO INDUSTRY***  
4 ***INTERFERENCE: A CONTENT ANALYSIS OF AUSTRALIAN***  
5 ***NEWSPAPER COVERAGE OF TOBACCO PLAIN PACKAGING 2008-2014***  
6  
7  
8

9 Corresponding author: Associate Professor Caroline Miller  
10 Population Health Research Group  
11 South Australian Health and Medical Research Institute (SAHMRI)  
12 North Terrace  
13 Adelaide, SA  
14 Australia  
15 Tel: 08 8128 4091  
16  
17  
18  
19  
20  
21

22 **Authors:** C Miller<sup>1</sup>, A Brownbill<sup>2</sup>, J Dono<sup>3</sup>, K Ettridge<sup>4</sup>  
23  
24

25 <sup>1</sup>School of Public Health, University of Adelaide, Nth Tce, SA 5000; Population  
26 Health Research Group, SAHMRI, Nth Tce, SA 5000; email:  
27 [caroline.miller@sahmri.com](mailto:caroline.miller@sahmri.com); ph: 8128 4091  
28  
29  
30

31 <sup>2</sup>School of Public Health, University of Adelaide, Nth Tce, SA 5000; Population  
32 Health Research Group, SAHMRI, Nth Tce, SA 5000; email:  
33 [aimee.brownbill@sahmri.com](mailto:aimee.brownbill@sahmri.com); ph: 8128 4646  
34  
35  
36

37 <sup>3</sup>Population Health Research Group, SAHMRI, Nth Tce, SA 5000; email:  
38 [jo.dono@sahmri.com](mailto:jo.dono@sahmri.com); ph: 8128 4093  
39  
40

41 <sup>4</sup>Population Health Research Group, SAHMRI, Nth Tce, SA 5000; email:  
42 [kerry.ettridge@sahmri.com](mailto:kerry.ettridge@sahmri.com); ph: 8128 4094  
43  
44  
45

46 **Running title:** Australian print media coverage of plain packaging

47 **Keywords:** Plain packaging, print media, content analysis

48 **Word count:** 1489  
49  
50  
51  
52  
53  
54  
55  
56  
57  
58  
59  
60

1  
2  
3  
4  
5  
6  
7  
8  
9  
10  
11  
12  
13  
14  
15  
16  
17  
18  
19  
20  
21  
22  
23  
24  
25  
26  
27  
28  
29  
30  
31  
32  
33  
34  
35  
36  
37  
38  
39  
40  
41  
42  
43  
44  
45  
46  
47  
48  
49  
50  
51  
52  
53  
54  
55  
56  
57  
58  
59  
60

For peer review only

## ABSTRACT

**Objectives:** In 2012 Australia was the first country in the world to introduce plain or standardised tobacco packaging, coupled with larger graphic health warnings. This policy was fiercely opposed by industry. Media coverage can be an influential contributor to public debate, and both public health advocates and industry sought media coverage for their positions. The aim of this study was to measure the print media coverage of Australian's plain packaging laws, from inception through roll-out, in major Australian newspapers.

**Methods:** This study monitored mainstream Australian print media (17 newspapers) coverage of the plain packaging policy debate and implementation, over a 7-year period from January 2008 to December 2014. Articles (n=701) were coded for article type, opinion slant and topic(s).

**Design:** Content analysis

**Results:** Coverage of plain packaging was low during pre-implementation phase (2008-2009), increasing sharply in the lead into legislative processes, and diminished substantially after implementation. Articles covered policy rationale, policy progress and industry arguments. Of the news articles 96% were neutrally framed. Of the editorials, 55% were supportive, 28% were opposing, 12% were neutral and 5% were mixed.

**Conclusions:** Protracted political debate, reflected in the media, led to an implementation delay of plain packaging. While Australian media provided comprehensive coverage of industry arguments, coverage was largely neutral or supportive of the policy. Countries seeking to implement plain packaging of tobacco should not be deterred by the volume of news coverage, but should actively promote

1  
2  
3 the evidence for plain packaging in the media to counteract the arguments of the  
4  
5 tobacco industry.  
6

### 7 **Strengths and limitations of this study**

- 9 • This content analysis provides detailed and comprehensive coverage of  
10 newspaper articles published pre- and post-implementation of the world-first  
11 tobacco plain packaging initiative in Australia.  
12  
13
- 14 • The observational design allowed us to monitor the contribution of industry  
15 arguments, which continue to be recycled around the globe, to the fierce and  
16 protracted policy debate played out in Australia's print media.  
17  
18
- 19 • Study results are limited to newspaper articles and therefore do not capture  
20 other sources of media influence (e.g. advertising).  
21  
22  
23  
24  
25  
26  
27  
28  
29  
30  
31  
32  
33  
34  
35  
36  
37  
38  
39  
40  
41  
42  
43  
44  
45  
46  
47  
48  
49  
50  
51  
52  
53  
54  
55  
56  
57  
58  
59  
60

## INTRODUCTION

Australia has led the world in introducing plain or standardised packaging of all tobacco products. Plain packaging came into effect on 1 December 2012.<sup>1,2</sup> The implementation was preceded by years of policy preparation, and intense lobbying by public health advocates and by industry against the globally unprecedented reforms. Several countries have since followed suit and are now in the process of debating, legislating and implementing plain tobacco packaging.<sup>3,4</sup> These jurisdictions routinely face industry opposition similar to that which occurred in Australia.<sup>5</sup>

Media play an important role in public policy debate.<sup>6,7</sup> Both industry and health advocates seek media coverage on matters of public health policy, understanding its role in influencing and reflecting public opinion and political decision makers. Newspaper, television and radio were central in Australian debate of plain packaging, as they were for previous policy reforms.<sup>8</sup> In addition to unpaid PR efforts, industry took out multiple full-page advertisements in Australia's major newspapers, as did Australian health agencies, although in far lesser volume.<sup>9</sup>

This report presents a study of the print media coverage in major Australian newspapers of Australia's plain packaging laws; from inception through roll-out. The observations start in January 2008, the year in which the Australian Government established the National Preventive Health Taskforce, whose draft (October 2008) and final reports (September 2009) recommended plain packaging.<sup>10</sup> On 29 April 2010, the Prime Minister announced that Australia would adopt plain packaging.<sup>11</sup> A general election was held in August 2010. After draft regulations were released in April 2011, protracted parliamentary debate occurred which led to an announcement

1  
2  
3 (2 November 2011) by the Minister for Health that implementation would be delayed.  
4  
5 The legislation passed on 1 December 2011; coming into effect 1 December 2012.<sup>12</sup>  
6  
7 The observations in this study conclude 2 years post-implementation in December  
8  
9 2014.  
10

## 11 12 13 **METHODS**

14  
15 Newspaper articles published between 1 January 2008 and 1 December 2014 were  
16  
17 sourced from all major Australian daily and weekend print newspapers through the  
18  
19 Australian/New Zealand Reference Centre and Factiva online database. Newspapers  
20  
21 were selected based on readership,<sup>13</sup> and included 2 national newspapers, and 10 daily  
22  
23 and 5 weekend state newspapers. Search terms were: plain, pack\*, tobacco, cigarette  
24  
25 and smok\* and a 'print media only' filter was applied. The search produced 2147  
26  
27 articles, which were screened for duplicates (n=482, articles duplicated in newspapers  
28  
29 across multiple editions), and against exclusion criteria (n=964) of: less than 5 lines  
30  
31 long (n=74); not relevant to plain packaging (n=778); and inappropriate article type  
32  
33 (n=112; e.g. cartoon), yielding 701 separate articles for analysis. Coding was based on  
34  
35 previous studies<sup>6, 14</sup> with minor amendments. Prominence was coded as *very high*:  
36  
37 page 1, *high*: pages 2-5, or *low*: page 6 onwards. Articles were coded by Type: *news*  
38  
39 (factual account of issues or events); *editorial* (opinion of newspaper or columnist);  
40  
41 *letters/comments* (letters to the editor and readers' comments sections), and for  
42  
43 Opinion Slant which focused on dominant view which was expressed by the author  
44  
45 and was coded as either *supporting*, *opposing*, *neutral* or *mixed* towards plain  
46  
47 packaging. One author coded all articles. A second researcher re-coded a randomly  
48  
49 selected 10% of articles. The Kappa score was 0.94.  
50  
51  
52  
53

## 54 **Patient and public involvement**



1  
2  
3 Neither patients nor the public were involved in this study.  
4  
5

## 6 7 **RESULTS**

### 8 9 **Volume and type of articles**

10  
11 During the observation period, plain packaging was mentioned in 701 articles (558  
12 news articles (79.6%), 11 editorials (14.3%), and 43 letters/comments (6.1% (39  
13 letters and 4 groups of comments)). The majority of articles were low prominence  
14 (70.0%), with 25.7% high prominence and 4.3% very high prominence. As depicted  
15 in Figure 1, print media coverage was prevalent at the times of: the announcement of  
16 intention to adopt plain packaging; the Australian general election which coincided  
17 with paid advertising by industry and health groups;<sup>9</sup> and release of the draft Bill for  
18 consultation through to the eventual passage of legislation. Coverage spiked again  
19 during the legal challenge in Australia's High Court (April 2012), and upon  
20 announcement that the industry's legal case had failed (August 2012). Smaller peaks  
21 were observed around actual implementation and in June 2013, in response to  
22 Britain's discontinuation of plain packaging laws and the release of some Australian  
23 data on impact. In June 2014, industry reported an increase in sales volumes (data not  
24 made publicly available), the Australian government released data showing a drop in  
25 sales, and there was a Media Watch critique.<sup>15</sup>  
26  
27  
28  
29  
30  
31  
32  
33  
34  
35  
36  
37  
38  
39  
40  
41  
42  
43  
44  
45

46 -----Insert Figure 1 about here-----  
47  
48  
49

### 50 51 **Opinion slant**

52 News articles were overwhelmingly neutral (96.1%). Of the editorials, 55.0% were  
53 supporting, 28.0% were opposing, 12.0% were neutral and 5.0% were mixed. Among  
54  
55  
56  
57  
58  
59  
60

1  
2  
3 letters/comments, 37.2% were supporting, 16.3% were opposing, 44.2% were mixed  
4  
5 and 2.3% were neutral.  
6  
7

### 8 9 **Content of articles**

10 Article content routinely covered multiple elements of plain packaging. Articles  
11  
12 featured updates on progress of the policy (policy announcements, consultations,  
13  
14 legislative process, implementation, legal challenges and their outcomes). The  
15  
16 rationale for plain packaging as a tobacco control initiative and the harms of smoking  
17  
18 to health were also routinely covered.  
19  
20  
21

22  
23  
24 Tobacco industry's objections and arguments were covered, including: 'nanny state'  
25  
26 objections; predictions that the policy 'wouldn't work'; predictions of unintended  
27  
28 consequences including smuggling and illicit trade, youth smoking, harm to small  
29  
30 business; as well as legal arguments about acquisition of intellectual property.  
31  
32

33  
34  
35 While industry arguments received widespread coverage, there was also coverage of  
36  
37 critique of industry data and arguments (see examples below).  
38  
39

40  
41  
42 *The tobacco industry warned yesterday plain packaging could see the price*  
43  
44 *of cigarettes halve over time, because generic packets would only benefit*  
45  
46 *counterfeiters and smugglers. "When all cigarette packs look the same and*  
47  
48 *lose their trademarks and distinguishing features, counterfeiters will have a*  
49  
50 *field day mass producing packets to smuggle into Australia," said David*  
51  
52 *Crow, chief executive of British American Tobacco.*  
53

54  
55 *The Age, 18/05/2011, pg6; News*  
56  
57

1  
2  
3  
4  
5 *Imperial says anecdotal evidence shows illicit trade has increased since*  
6 *plain packaging. But Australian Customs and Border Protection says*  
7 *tobacco seizure data since the new laws were introduced "does not support*  
8 *tobacco industry claims that plain packaging would result in a big spike in*  
9 *illegal tobacco imports". The Age, 10/10/2013, p22; News*  
10  
11  
12  
13  
14  
15  
16  
17

18 Industry calls for delays for implementation were covered in the media. For example,  
19 industry argued there would be supply issues as the proposed implementation timeline  
20 was too tight. The July 2012 deadline was subsequently extended to December 2012.  
21  
22  
23  
24  
25

26 *SMOKERS face the prospect of being unable to purchase their preferred*  
27 *brand of cigarettes when plain packaging is introduced, with the tobacco*  
28 *industry warning it will not be able to supply the olive-green packs by next*  
29 *year's July 1 deadline. The Australian, 5/08/2011, pg6; News*  
30  
31  
32  
33  
34  
35  
36

37 Industry tactics featured in a wave of stories, following a TV investigative journalism  
38 piece about industry funding of a "front-organisation".  
39  
40  
41  
42  
43

44 *Senator Siewert recalled that the international tobacco companies spent*  
45 *\$5million during the election campaign "using a front organisation the Alliance*  
46 *of Australian Retailers in an attempt to prevent the introduction of plain*  
47 *packaging laws". The Canberra Times, 20/11/2010, pg15, News*  
48  
49  
50  
51  
52  
53

54 The likely effectiveness of plain packaging was a major source of debate, as was the  
55  
56  
57  
58  
59  
60

1  
2  
3 need to stand up to industry to pursue tobacco control policy for health.  
4  
5

6  
7 *"Let there be no mistake, big tobacco is fighting the government for one very*  
8 *simple reason — because it knows, as we do, that plain packaging will work," Ms*  
9 *Roxon [then Australian Attorney General] said The Age, 22/12/2011, pg1; News*  
10  
11  
12  
13

14  
15 *Globally, we need to present a strong and united front to tobacco industry*  
16 *interference so we can finally end the pain, illness, suffering and costs caused by*  
17 *tobacco. Herald Sun, 28/05/2012, pg23; Editorial.*  
18  
19  
20  
21  
22  
23

## 24 **DISCUSSION**

25  
26 Media coverage of Australia's plain packaging was extensive and reflected the  
27 protracted political debate and delays in implementing plain packaging. Plain  
28 packaging saw the tobacco industry step into the media in a way that had not been  
29 seen in Australia for many years. Media coverage provided comprehensive coverage  
30 of industry arguments, but it also covered critiques of industry's data, industry's  
31 arguments and practices. Despite the apparent volume, much of the coverage was of  
32 low prominence, neutral and/or supportive in framing, and interest largely dissipated  
33 upon implementation.  
34  
35  
36  
37  
38  
39  
40  
41  
42  
43  
44  
45

46 Recent research on industry responses to plain packaging proposals in other  
47 jurisdictions have demonstrated that claims used in Australia, such as increased illicit  
48 trade and negative economic consequences, are being recycled despite evidence  
49 clearly demonstrating the falsehood of such claims.<sup>5, 16-18</sup> One study identified 173  
50 arguments against plain packaging in tobacco industry documents submitted during a  
51  
52  
53  
54  
55  
56  
57  
58  
59  
60

1  
2  
3 plain packaging consultation process in the United Kingdom.<sup>18</sup> These tactics serve to  
4  
5 overwhelm and to delay policy adoption and implementation, but do not hold up to  
6  
7 scrutiny when challenged<sup>4</sup>. Consequently, plain packaging laws have since passed in  
8  
9 the UK, Ireland, NZ and France, with more likely to follow.  
10

11  
12  
13 This study focused on newspaper articles and did not include other sources of media  
14  
15 influence (e.g. advertising). It may have missed articles not contained within the  
16  
17 database. Nevertheless, this study demonstrates how large volumes of industry  
18  
19 misinformation can be challenged and thwarted using evidence-based public health  
20  
21 advocacy. Countries seeking to implement plain packaging of tobacco should not be  
22  
23 deterred by the volume of news coverage of plain packaging debates or coverage of  
24  
25 industry counter-arguments, but should be actively promoting the policy rationale and  
26  
27 evidence for plain packaging in the media to counteract the response of the tobacco  
28  
29 industry.  
30  
31  
32  
33  
34

### 35 **ACKNOWLEDGEMENTS**

36  
37 None.

### 38 **COMPETING INTERESTS**

39  
40  
41 None.

### 42 **FUNDING**

43  
44  
45 This research received no specific grant from any funding agency in the public,  
46  
47 commercial or not-for-profit sectors.  
48  
49

### 50 **DATA SHARING STATEMENT**

51  
52 The dataset analysed during the current study is available from the corresponding  
53  
54 author on reasonable request.  
55  
56  
57  
58  
59  
60

### **AUTHOR'S CONTRIBUTIONS**

CM and KE conceptualised the study. KE and AB designed the study with input from CM and JD. AB collected and analysed the data and all authors contributed to interpretation of the results. CM drafted the manuscript, which was critically reviewed by all authors. The final version was approved by all authors.

For peer review only

**REFERENCES**

1. Australian Government Federal Register of Legislation. Tobacco Plain Packaging Act 2011. 2011 [accessed 26 Mar 2018]. Available from: <http://www.comlaw.gov.au/details/c2011a00148>.
2. Scollo M, Lindorff K, Coomber K, Bayly M, Wakefield M. Standardised packaging and new enlarged graphic health warnings for tobacco products in Australia—legislative requirements and implementation of the Tobacco Plain Packaging Act 2011 and the Competition and Consumer (Tobacco) Information Standard, 2011. *Tob Control*. 2015;24(Suppl 2):ii9.
3. Jaan Murphy. Australia's WTO plain cigarette packaging case: an update. Canberra: Parliament of Australia; 2014 Jul 8 [accessed 26 Mar 2018]. Available from: [http://www.aph.gov.au/About\\_Parliament/Parliamentary\\_Departments/Parliamentary\\_Library/FlagPost/2014/July/WTO\\_plain\\_cigarette\\_packaging\\_case](http://www.aph.gov.au/About_Parliament/Parliamentary_Departments/Parliamentary_Library/FlagPost/2014/July/WTO_plain_cigarette_packaging_case).
4. WHO. Plain packaging of tobacco products: evidence, design and implementation. Geneva: World Health Organization, 2016.
5. Daube M, Eastwood P, Mishima M, Peters M. Tobacco plain packaging: The Australian experience. *Respirology*. 2015;20(7):1001-3.
6. Wakefield MA, Brennan E, Durkin SJ, McLeod K, Smith KC. Still a burning issue: trends in the volume, content and population reach of newspaper coverage about tobacco issues. *Crit Public Health*. 2011;21(3):313-25.
7. Dunlop SM, Cotter T, Perez D, Chapman S. Tobacco in the news: associations between news coverage, news recall and smoking-related outcomes in a sample of Australian smokers and recent quitters. *Health Educ Res*. 2012;27(1):160-71.

- 1  
2  
3 8. Miller CL, Hill DJ, Quester PG, Hiller JE. Response of mass media, tobacco  
4 industry and smokers to the introduction of graphic cigarette pack warnings in  
5 Australia. *Eur J Public Health*. 2009;19(6):644-9.  
6  
7  
8  
9 9. Scollo MM, Freeman B, Greenhalg EM. 11.10 Packaging as promotion:  
10 evidence for and effects of plain packaging. Melbourne: Cancer Council Victoria;  
11 2016 [updated Sep 2017; cited 2018 Mar 23]. Available from:  
12  
13 [http://www.tobaccoinaustralia.org.au/chapter-11-advertising/11-10-packaging-as-](http://www.tobaccoinaustralia.org.au/chapter-11-advertising/11-10-packaging-as-promotion)  
14 [promotion](http://www.tobaccoinaustralia.org.au/chapter-11-advertising/11-10-packaging-as-promotion).  
15  
16  
17  
18  
19  
20 10. National Preventative Health Taskforce. Australia: The healthiest country by  
21 2020. A discussion paper prepared by the National Preventative Health Taskforce.  
22 Canberra: Australian Government, 2018.  
23  
24  
25  
26 11. Cancer Council. Timeline, international developments & major news stories.  
27 [accessed 26 Mar 2018]. Available from:  
28  
29 [https://www.cancervic.org.au/plainfacts/browse.asp?ContainerID=timelineandinternat](https://www.cancervic.org.au/plainfacts/browse.asp?ContainerID=timelineandinternationaldevelopments)  
30 [ionaldevelopments](https://www.cancervic.org.au/plainfacts/browse.asp?ContainerID=timelineandinternationaldevelopments).  
31  
32  
33  
34  
35 12. Australian Government Department of Health. Introduction of Tobacco Plain  
36 Packaging in Australia. 2014 [updated 23 Oct 2017; accessed 26 Mar 2018].  
37 Available from:  
38  
39 <http://www.health.gov.au/internet/main/publishing.nsf/Content/tobacco-plain>.  
40  
41  
42  
43  
44 13. Morgan R. Australian Newspaper Readership, 12 months to June 2014 2014  
45 [accessed 22 Aug 2014]. Available from:  
46  
47 <http://www.roymorgan.com/industries/media/readership/newspaper-readership>.  
48  
49  
50 14. Clegg Smith K, Wakefield M, Siebel C, Szczypka G, Slater S, Terry-McElrath  
51 Y, Emery S, Chaloupka F. J. Coding the news: the development of a methodological  
52  
53  
54  
55  
56  
57  
58  
59  
60



1  
2  
3 framework for coding and analyzing newspaper coverage of tobacco issues.

4  
5 ImpacTeen Research Paper Series, 21. 2002.

6  
7 15. Paul Barry. Up in smoke. The Australian's exclusive story on plain packaging  
8 is just plain wrong. In: Adams J, editor. Media Watch: Australian Broadcasting  
9 Corporation; 2014 Jun 16 [accessed 26 Mar 2018]. Available from:

10  
11 <http://www.abc.net.au/mediawatch/transcripts/s4026465.htm>.

12  
13  
14  
15 16. Waa AM, Hoek J, Edwards R, Maclaurin J. Analysis of the logic and framing  
16 of a tobacco industry campaign opposing standardised packaging legislation in New  
17 Zealand. Tob Control. 2016;26(6):629.

18  
19  
20  
21 22. 17. Ulucanlar S, Fooks GJ, Hatchard JL, Gilmore AB. Representation and  
23 misrepresentation of scientific evidence in contemporary tobacco regulation: a review  
24 of tobacco industry submissions to the UK Government consultation on standardised  
25 packaging. PLoS Medicine. 2014;11(3):e1001629.

26  
27  
28  
29 30. 18. Lie JLY, Fooks G, de Vries NK, Heijndijk SM, Willemsen MC. Can't see the  
31 woods for the trees: exploring the range and connection of tobacco industry  
32 argumentation in the 2012 UK standardised packaging consultation. Tob Control.  
33 2017:tobaccocontrol-2017.

1  
2  
3 **FIGURE 1. Volume of print media articles on plain packaging, Jan 2008 - Nov**  
4 **2014**  
5  
6  
7  
8  
9  
10  
11  
12  
13  
14  
15  
16  
17  
18  
19  
20  
21  
22  
23  
24  
25  
26  
27  
28  
29  
30  
31  
32  
33  
34  
35  
36  
37  
38  
39  
40  
41  
42  
43  
44  
45  
46  
47  
48  
49  
50  
51  
52  
53  
54  
55  
56  
57  
58  
59  
60

For peer review only

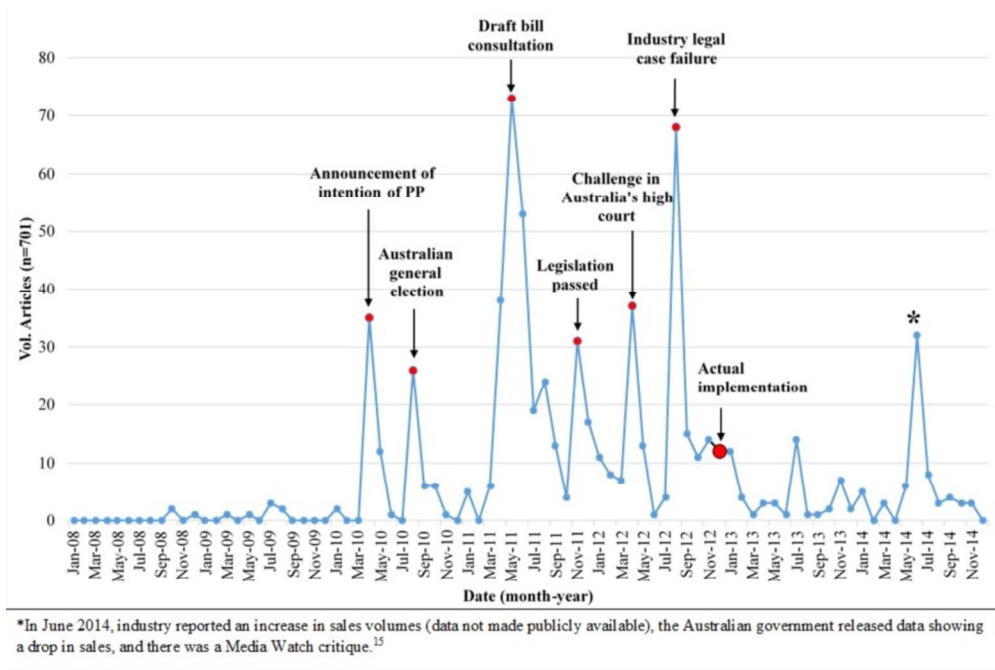

Figure 1. Volume of print media articles on plain packaging, Jan 2008 - Nov 2014

342x228mm (300 x 300 DPI)

STROBE Statement—Checklist of items that should be included in reports of *cross-sectional studies*

|                              | Item No | Recommendation                                                                                                                                                                                               |    |
|------------------------------|---------|--------------------------------------------------------------------------------------------------------------------------------------------------------------------------------------------------------------|----|
| <b>Title and abstract</b>    | 1       | (a) Indicate the study's design with a commonly used term in the title or the abstract                                                                                                                       | P1 |
|                              |         | (b) Provide in the abstract an informative and balanced summary of what was done and what was found                                                                                                          | P3 |
| <b>Introduction</b>          |         |                                                                                                                                                                                                              |    |
| Background/rationale         | 2       | Explain the scientific background and rationale for the investigation being reported                                                                                                                         | P4 |
| Objectives                   | 3       | State specific objectives, including any prespecified hypotheses                                                                                                                                             | P4 |
| <b>Methods</b>               |         |                                                                                                                                                                                                              |    |
| Study design                 | 4       | Present key elements of study design early in the paper                                                                                                                                                      | P5 |
| Setting                      | 5       | Describe the setting, locations, and relevant dates, including periods of recruitment, exposure, follow-up, and data collection                                                                              | P5 |
| Participants                 | 6       | (a) Give the eligibility criteria, and the sources and methods of selection of participants                                                                                                                  | na |
| Variables                    | 7       | Clearly define all outcomes, exposures, predictors, potential confounders, and effect modifiers. Give diagnostic criteria, if applicable                                                                     | P5 |
| Data sources/<br>measurement | 8*      | For each variable of interest, give sources of data and details of methods of assessment (measurement). Describe comparability of assessment methods if there is more than one group                         | P5 |
| Bias                         | 9       | Describe any efforts to address potential sources of bias                                                                                                                                                    | na |
| Study size                   | 10      | Explain how the study size was arrived at                                                                                                                                                                    | na |
| Quantitative variables       | 11      | Explain how quantitative variables were handled in the analyses. If applicable, describe which groupings were chosen and why                                                                                 | na |
| Statistical methods          | 12      | (a) Describe all statistical methods, including those used to control for confounding                                                                                                                        | na |
|                              |         | (b) Describe any methods used to examine subgroups and interactions                                                                                                                                          | na |
|                              |         | (c) Explain how missing data were addressed                                                                                                                                                                  | na |
|                              |         | (d) If applicable, describe analytical methods taking account of sampling strategy                                                                                                                           | na |
|                              |         | (e) Describe any sensitivity analyses                                                                                                                                                                        | na |
| <b>Results</b>               |         |                                                                                                                                                                                                              |    |
| Participants                 | 13*     | (a) Report numbers of individuals at each stage of study—eg numbers potentially eligible, examined for eligibility, confirmed eligible, included in the study, completing follow-up, and analysed            | na |
|                              |         | (b) Give reasons for non-participation at each stage                                                                                                                                                         | na |
|                              |         | (c) Consider use of a flow diagram                                                                                                                                                                           | na |
| Descriptive data             | 14*     | (a) Give characteristics of study participants (eg demographic, clinical, social) and information on exposures and potential confounders                                                                     | na |
|                              |         | (b) Indicate number of participants with missing data for each variable of interest                                                                                                                          | na |
| Outcome data                 | 15*     | Report numbers of outcome events or summary measures                                                                                                                                                         | P6 |
| Main results                 | 16      | (a) Give unadjusted estimates and, if applicable, confounder-adjusted estimates and their precision (eg, 95% confidence interval). Make clear which confounders were adjusted for and why they were included | na |
|                              |         | (b) Report category boundaries when continuous variables were categorized                                                                                                                                    | na |
|                              |         | (c) If relevant, consider translating estimates of relative risk into absolute risk for                                                                                                                      | na |

|                          |    |                                                                                                                                                                            |       |
|--------------------------|----|----------------------------------------------------------------------------------------------------------------------------------------------------------------------------|-------|
|                          |    | a meaningful time period                                                                                                                                                   |       |
| Other analyses           | 17 | Report other analyses done—eg analyses of subgroups and interactions, and sensitivity analyses                                                                             | na    |
| <b>Discussion</b>        |    |                                                                                                                                                                            |       |
| Key results              | 18 | Summarise key results with reference to study objectives                                                                                                                   | P9    |
| Limitations              | 19 | Discuss limitations of the study, taking into account sources of potential bias or imprecision. Discuss both direction and magnitude of any potential bias                 | P10   |
| Interpretation           | 20 | Give a cautious overall interpretation of results considering objectives, limitations, multiplicity of analyses, results from similar studies, and other relevant evidence | P10   |
| Generalisability         | 21 | Discuss the generalisability (external validity) of the study results                                                                                                      | P9-10 |
| <b>Other information</b> |    |                                                                                                                                                                            |       |
| Funding                  | 22 | Give the source of funding and the role of the funders for the present study and, if applicable, for the original study on which the present article is based              | na    |

\*Give information separately for exposed and unexposed groups.

**Note:** An Explanation and Elaboration article discusses each checklist item and gives methodological background and published examples of transparent reporting. The STROBE checklist is best used in conjunction with this article (freely available on the Web sites of PLoS Medicine at <http://www.plosmedicine.org/>, Annals of Internal Medicine at <http://www.annals.org/>, and Epidemiology at <http://www.epidem.com/>). Information on the STROBE Initiative is available at [www.strobe-statement.org](http://www.strobe-statement.org).

# BMJ Open

## PRESENTING A STRONG AND UNITED FRONT TO TOBACCO INDUSTRY INTERFERENCE: A CONTENT ANALYSIS OF AUSTRALIAN NEWSPAPER COVERAGE OF TOBACCO PLAIN PACKAGING 2008-2014

|                                 |                                                                                                                                                                                                                                                                                                                                                                                                                                                                                                                                                       |
|---------------------------------|-------------------------------------------------------------------------------------------------------------------------------------------------------------------------------------------------------------------------------------------------------------------------------------------------------------------------------------------------------------------------------------------------------------------------------------------------------------------------------------------------------------------------------------------------------|
| Journal:                        | <i>BMJ Open</i>                                                                                                                                                                                                                                                                                                                                                                                                                                                                                                                                       |
| Manuscript ID                   | bmjopen-2018-023485.R1                                                                                                                                                                                                                                                                                                                                                                                                                                                                                                                                |
| Article Type:                   | Research                                                                                                                                                                                                                                                                                                                                                                                                                                                                                                                                              |
| Date Submitted by the Author:   | 23-Jul-2018                                                                                                                                                                                                                                                                                                                                                                                                                                                                                                                                           |
| Complete List of Authors:       | Miller, Caroline; University of Adelaide, School of Public Health; South Australian Health and Medical Research Institute, Population Health Research Group<br>Brownbill, Aimee; The University of Adelaide, School of Public Health; South Australian Health and Medical Research Institute, Population Health Research Group<br>Dono, Joanne; South Australian Health and Medical Research Institute, Population Health Research Group<br>Ettridge, Kerry; South Australian Health and Medical Research Institute, Population Health Research Group |
| <b>Primary Subject Heading</b>: | Public health                                                                                                                                                                                                                                                                                                                                                                                                                                                                                                                                         |
| Secondary Subject Heading:      | Public health, Smoking and tobacco                                                                                                                                                                                                                                                                                                                                                                                                                                                                                                                    |
| Keywords:                       | tobacco, plain packaging, content analysis, print media                                                                                                                                                                                                                                                                                                                                                                                                                                                                                               |
|                                 |                                                                                                                                                                                                                                                                                                                                                                                                                                                                                                                                                       |

SCHOLARONE™  
Manuscripts

1  
2  
3 ***PRESENTING A STRONG AND UNITED FRONT TO TOBACCO INDUSTRY***  
4 ***INTERFERENCE: A CONTENT ANALYSIS OF AUSTRALIAN***  
5 ***NEWSPAPER COVERAGE OF TOBACCO PLAIN PACKAGING 2008-2014***  
6  
7  
8

9 Corresponding author: Associate Professor Caroline Miller  
10 Population Health Research Group  
11 South Australian Health and Medical Research Institute (SAHMRI)  
12 North Terrace  
13 Adelaide, SA  
14 Australia  
15  
16  
17  
18  
19 Tel: +61 8 8128 4091  
20  
21

22 **Authors:** CL Miller<sup>1</sup>, AL Brownbill<sup>2</sup>, J Dono<sup>3</sup>, K Ettridge<sup>4</sup>  
23  
24

25 <sup>1</sup>School of Public Health, University of Adelaide, Nth Tce, SA 5000; Population  
26 Health Research Group, SAHMRI, Nth Tce, SA 5000; email:  
27 [caroline.miller@sahmri.com](mailto:caroline.miller@sahmri.com); ph: +61 8 8128 4091  
28  
29

30  
31 <sup>2</sup>School of Public Health, University of Adelaide, Nth Tce, SA 5000; Population  
32 Health Research Group, SAHMRI, Nth Tce, SA 5000; email:  
33 [aimee.brownbill@sahmri.com](mailto:aimee.brownbill@sahmri.com); ph: +61 8 8128 4646  
34  
35

36  
37 <sup>3</sup>Population Health Research Group, SAHMRI, Nth Tce, SA 5000; email:  
38 [jo.dono@sahmri.com](mailto:jo.dono@sahmri.com); ph: +61 8 8128 4093  
39  
40

41 <sup>4</sup>Population Health Research Group, SAHMRI, Nth Tce, SA 5000; email:  
42 [kerry.ettridge@sahmri.com](mailto:kerry.ettridge@sahmri.com); ph: +61 8 8128 4094  
43  
44

45  
46 **Running title:** Australian print media coverage of plain packaging  
47

48 **Keywords:** Plain packaging, print media, content analysis  
49

50 **Word count:** 3085  
51  
52  
53  
54  
55  
56  
57  
58  
59  
60

## ABSTRACT

**Objectives:** In 2012 Australia was the first country in the world to introduce plain or standardised tobacco packaging, coupled with larger graphic health warnings. This policy was fiercely opposed by industry. Media coverage can be an influential contributor to public debate, and both public health advocates and industry sought media coverage for their positions. The aim of this study was to measure the print media coverage of Australian's plain packaging laws, from inception through roll-out, in major Australian newspapers.

**Methods:** This study monitored mainstream Australian print media (17 newspapers) coverage of the plain packaging policy debate and implementation, over a 7-year period from January 2008 to December 2014. Articles (n=701) were coded for article type, opinion slant and topic(s).

**Design:** Content analysis

**Results:** Coverage of plain packaging was low during pre-implementation phase (2008-2009), increasing sharply in the lead into legislative processes, and diminished substantially after implementation. Articles covered policy rationale, policy progress and industry arguments. Of the news articles 96% were neutrally framed. Of the editorials, 55% were supportive, 28% were opposing, 12% were neutral and 5% were mixed.

**Conclusions:** Protracted political debate, reflected in the media, led to an implementation delay of plain packaging. While Australian media provided comprehensive coverage of industry arguments, news coverage was largely neutral, whereas editorials were mostly supportive or neutral of the policy. Countries seeking to implement plain packaging of tobacco should not be deterred by the volume of



1  
2  
3 news coverage, but should actively promote the evidence for plain packaging in the  
4  
5 media to counteract the arguments of the tobacco industry.  
6

### 7 **Strengths and limitations of this study**

- 9 • This content analysis provides detailed and comprehensive coverage of  
10 newspaper articles published pre- and post-implementation of the world-first  
11 tobacco plain packaging initiative in Australia.  
12  
13
- 14 • The observational design allowed us to monitor the contribution of industry  
15 arguments, which continue to be recycled around the globe, to the fierce and  
16 protracted policy debate played out in Australia's print media.  
17  
18
- 19 • Study results are limited to newspaper articles and therefore do not capture  
20 other sources of media influence (e.g. advertising).  
21  
22  
23  
24  
25  
26  
27  
28  
29  
30  
31  
32  
33  
34  
35  
36  
37  
38  
39  
40  
41  
42  
43  
44  
45  
46  
47  
48  
49  
50  
51  
52  
53  
54  
55  
56  
57  
58  
59  
60

## INTRODUCTION

Australia has led the world in introducing plain or standardised packaging of all tobacco products. Plain packaging came into effect on 1 December 2012.<sup>1,2</sup> The implementation was preceded by years of policy preparation, and intense lobbying by public health advocates and by industry against the globally unprecedented reforms. The passing of legislation was followed by multiple, unsuccessful legal challenges by industry. Several countries have since followed suit and are now in the process of debating, legislating and implementing plain tobacco packaging.<sup>3,4</sup> These jurisdictions routinely face industry opposition similar to that which occurred in Australia.<sup>5</sup>

Media play an important role in public policy debate.<sup>6,7</sup> Both industry and health advocates seek media coverage on matters of public health policy, understanding its role in influencing and reflecting public opinion and political decision makers. The agenda setting function of the media is well established.<sup>8</sup> The amount of media coverage can signal the importance of an issue and contribute to guiding the public's response.<sup>9,10</sup> Furthermore, media content can shape public discourse by how the issue is framed, that is, how the issue is presented to give salience to one aspect over others in order to give meaning to the audience.<sup>11</sup> Studies across multiple jurisdictions have shown that tobacco policy frequently features in news coverage<sup>6,12-14</sup> and that such coverage can influence public perceptions<sup>15,16</sup> as well as policy and behaviour change.<sup>12,17,18</sup> Tobacco control coverage is often cast favourably.<sup>6,12-14,19-21</sup> Yet, the tobacco industry has used the media to thwart policy progression by reframing the health issue as an economic, commercial or political issue.<sup>22,23</sup> The media utilises controversy to sell newspapers and so coverage can take on the voice of the dominant

1  
2 stakeholder rather than the scientific evidence.<sup>24, 25</sup> Furthermore, the ideological and  
3 financial positioning of a newspaper can influence editorial decisions on what to  
4 publish.<sup>26</sup>  
5  
6  
7  
8  
9

10  
11 Newspaper, television and radio were central in Australian debate of plain packaging,  
12 as they were for previous policy reforms such as smoke-free policies,<sup>24, 27-31</sup> tax  
13 initiatives,<sup>32, 33</sup> point-of-sale reforms,<sup>34</sup> and graphic health warnings.<sup>35</sup> The media also  
14 has a role in how current tobacco control issues are portrayed, such as those relating  
15 to illicit trade<sup>15, 36</sup> and electronic cigarettes.<sup>37</sup> With regard to plain packaging, one  
16 New Zealand study<sup>38</sup> explored the rhetoric used by the Tobacco Industry in a mass  
17 media advertising campaign designed to sway public opinion against the adoption of  
18 plain packaging. They found that common tactics included logical fallacies and  
19 unsound arguments. In an examination of online comments posted in response to  
20 news articles reporting on the announcement of the plain packaging initiative in 2010,  
21 Freeman<sup>23</sup> found that the prevailing argument opposing the initiative was the same as  
22 that used in a mass media campaign funded by the tobacco industry. These analyses  
23 of tobacco control related news articles demonstrate the importance of public health  
24 advocacy in counteracting the arguments put forward by the tobacco industry.  
25  
26 Furthermore, Australian tobacco control advocacy groups have a history of  
27 contributing to the news discourse and shaping policy development.<sup>22, 25, 39</sup>  
28  
29 Nevertheless, the campaign against plain packaging was prolonged and intense. In  
30 addition to unpaid PR efforts, industry took out multiple full-page advertisements in  
31 Australia's major newspapers, as did Australian health agencies, although in far less  
32 volume.<sup>40</sup>  
33  
34  
35  
36  
37  
38  
39  
40  
41  
42  
43  
44  
45  
46  
47  
48  
49  
50  
51  
52  
53  
54  
55  
56  
57  
58  
59  
60

1  
2  
3 This study aimed to document the volume and content of the print media coverage in  
4 major Australian newspapers of Australian's plain packaging laws; from inception  
5 through roll-out. The observations start in January 2008, the year in which the  
6  
7 Australian Government established the National Preventive Health Taskforce, whose  
8  
9 draft (October 2008) and final reports (September 2009) recommended plain  
10  
11 packaging.<sup>41</sup> On 29 April 2010, the Prime Minister announced that Australia would  
12  
13 adopt plain packaging.<sup>42</sup> A general election was held in August 2010. After draft  
14  
15 regulations were released in April 2011, protracted parliamentary debate occurred  
16  
17 which led to an announcement (2 November 2011) by the Minister for Health that  
18  
19 implementation would be delayed. The legislation passed on 1 December 2011;  
20  
21 coming into effect 1 December 2012.<sup>43</sup> The observations in this study conclude 2  
22  
23 years post-implementation in December 2014.  
24  
25  
26  
27  
28  
29  
30

## 31 **METHODS**

32  
33 Newspaper articles published between 1 January 2008 and 1 December 2014 were  
34  
35 sourced from all major Australian daily and weekend print newspapers through the  
36  
37 Australian/New Zealand Reference Centre and Factiva online database, both of which  
38  
39 contain full-text articles. The major (i.e. most read) newspapers of each state/territory  
40  
41 were selected, and a minimum of 100,000 readership was required in those states  
42  
43 having multiple major newspapers.<sup>44</sup> This included 2 national newspapers, 10 daily  
44  
45 and 5 weekend state newspapers. Articles were searched using the following terms:  
46  
47 plain, pack\*, tobacco, cigarette and smok\*; the default search settings for both  
48  
49 databases were used (i.e. Australian/New Zealand Reference Centre: title, keywords,  
50  
51 description; Factiva: full-text) and a 'print media only' filter was applied. The search  
52  
53 produced 2147 articles, which were screened for duplicates (n=482, articles  
54  
55  
56  
57  
58  
59  
60

1  
2  
3 duplicated in newspapers across multiple editions), and against exclusion criteria  
4 (n=964) of: less than 5 lines long (n=74); not relevant to plain packaging (n=778); and  
5 inappropriate article type (n=112; e.g. cartoon), yielding 701 separate articles for  
6 analysis. Coding was based on previous studies<sup>6, 45</sup> with minor amendments to  
7 account for the use of online databases rather than hardcopy newspaper clippings. The  
8 coding of prominence was also modified because imagery accompanying an article  
9 was used to define prominence in previous studies whereas imagery was not available  
10 from the online databases used in this study. Prominence was coded as *very high*:  
11 page 1, *high*: pages 2-5, or *low*: page 6 onwards. Articles were coded by Type: *news*  
12 (factual account of issues or events); *editorial* (opinion of newspaper or columnist);  
13 *letters/comments* (letters to the editor and readers' comments sections; included for  
14 comprehensiveness of coverage but excluded from analysis as they did not contain  
15 sufficient detail), and for Opinion Slant which focused on the dominant view which  
16 was expressed by the author and was coded as either *supporting*, *opposing*, *neutral*  
17 (i.e. author expressed no opinion) or *mixed* (i.e. author expressed both supporting and  
18 opposing opinions) towards plain packaging. One author coded all articles. A second  
19 researcher re-coded a randomly selected 10% of articles. The Kappa score was 0.94.

### 20 **Patient and public involvement**

21 Neither patients nor the public were involved in this study.

## 22 **RESULTS**

### 23 **Volume and type of articles**

24 During the observation period, plain packaging was mentioned in 701 articles (558  
25 news articles (79.6%), 100 editorials (14.3%), and 43 letters/comments (6.1% (39  
26 letters and 4 groups of comments)). The majority of articles were low prominence  
27  
28  
29  
30  
31  
32  
33  
34  
35  
36  
37  
38  
39  
40  
41  
42  
43  
44  
45  
46  
47  
48  
49  
50  
51  
52  
53  
54  
55  
56  
57  
58  
59  
60

1  
2  
3 (70.0%), with 25.7% high prominence and 4.3% very high prominence. As depicted  
4 in Figure 1, print media coverage was prevalent at the times of: the announcement of  
5 intention to adopt plain packaging; the Australian general election which coincided  
6 with paid advertising by industry and health groups;<sup>40</sup> and release of the draft Bill for  
7 consultation through to the eventual passage of legislation. Coverage spiked again  
8 during the legal challenge in Australia's High Court (April 2012), and upon  
9 announcement that the industry's legal case had failed (August 2012). Smaller peaks  
10 were observed around actual implementation and in June 2013, in response to  
11 Britain's discontinuation of plain packaging laws and the release of some Australian  
12 data on impact. In June 2014, industry reported an increase in sales volumes (data not  
13 made publicly available), the Australian government released data showing a drop in  
14 sales, and there was a Media Watch critique.<sup>46</sup>

15  
16  
17  
18  
19  
20  
21  
22  
23  
24  
25  
26  
27  
28  
29  
30  
31 -----Insert Figure 1 about here-----  
32  
33  
34

### 35 **Opinion slant**

36 News articles were overwhelmingly neutral (96.1%). Of the editorials, 55.0% were  
37 supporting, 28.0% were opposing, 12.0% were neutral and 5.0% were mixed. Among  
38 letters/comments, 37.2% were supporting, 16.3% were opposing, 44.2% were mixed  
39 and 2.3% were neutral.  
40  
41  
42  
43  
44  
45  
46  
47

### 48 **Relationship between article type, prominence and opinion slant**

49 Of the 30 (4.3%) articles achieving very high prominence, two were supporting plain  
50 packaging (one news article, one editorial) and the remainder were neutral news  
51 articles. The two supporting articles achieving front page coverage were both  
52  
53  
54  
55  
56  
57  
58  
59  
60

1  
2  
3 published in 2012, the first article (editorial) in January following the passing of plain  
4 packaging legislation and the second article (news) in August following the industry  
5 legal case failure. The majority of high prominence articles were also neutral (169 out  
6 of 180), however, there were nine articles supporting plain packaging (4 editorials, 3  
7 news articles, and 2 letters) and two editorials opposing plain packaging. Both  
8 opposing editorials were published on 18 June 2014 in *The Australian* (national daily  
9 newspaper), in response to the critique of the industry released report on cigarette  
10 sales volume since plain packaging. A supporting editorial was also published during  
11 this period (24 June 2014; *The Canberra Times*). All of the remaining high  
12 prominence articles were published prior to implementation. Two articles (one news,  
13 one editorial), published in September 2010, were critiques of the ‘It won’t work’<sup>40</sup>  
14 mass media and public relations campaign funded by the tobacco industry. An  
15 editorial was published in May 2011, coinciding with the prolific reporting of the  
16 draft bill consultation. Two articles (one news, one editorial), published in April 2012,  
17 were reporting on the tobacco industry’s High Court challenge, and a news article  
18 published in August 2012, reported on the failure of this challenge.  
19  
20  
21  
22  
23  
24  
25  
26  
27  
28  
29  
30  
31  
32  
33  
34  
35  
36  
37  
38  
39

### 40 **Content of articles**

41 Article content routinely covered multiple elements of plain packaging. Articles  
42 featured updates on progress of the policy (policy announcements, consultations,  
43 legislative process, implementation, legal challenges and their outcomes). The  
44 rationale for plain packaging as a tobacco control initiative and the harms of smoking  
45 to health were also routinely covered.  
46  
47  
48  
49  
50  
51  
52  
53

54 Tobacco industry’s objections and arguments were covered, including: ‘nanny state’  
55  
56  
57  
58  
59  
60

1  
2  
3 objections; predictions that the policy ‘wouldn’t work’; predictions of unintended  
4 consequences including smuggling and illicit trade, youth smoking, harm to small  
5 business; as well as legal arguments about acquisition of intellectual property.  
6  
7  
8  
9

10  
11 While industry arguments received widespread coverage, there was also coverage of  
12 critique of industry data and arguments, even from newspapers that are traditionally  
13 anti-regulation (see examples below).  
14  
15  
16  
17  
18  
19

20 *The tobacco industry warned yesterday plain packaging could see the price*  
21 *of cigarettes halve over time, because generic packets would only benefit*  
22 *counterfeiters and smugglers. "When all cigarette packs look the same and*  
23 *lose their trademarks and distinguishing features, counterfeiters will have a*  
24 *field day mass producing packets to smuggle into Australia," said David*  
25 *Crow, chief executive of British American Tobacco.*  
26  
27  
28  
29  
30  
31  
32

33 *The Age, 18/05/2011, pg6; News*  
34  
35  
36

37 *Imperial says anecdotal evidence shows illicit trade has increased since*  
38 *plain packaging. But Australian Customs and Border Protection says*  
39 *tobacco seizure data since the new laws were introduced "does not support*  
40 *tobacco industry claims that plain packaging would result in a big spike in*  
41 *illegal tobacco imports". The Age, 10/10/2013, p22; News*  
42  
43  
44  
45  
46  
47  
48  
49

50 *This newspaper favours the use of market mechanisms to achieve policy*  
51 *outcomes rather than the imposition of regulations that restrict the use of*  
52 *private property. While the government does have a legitimate interest in*  
53  
54  
55  
56  
57  
58  
59  
60



1  
2  
3 *public health, individuals also have a right to decide their tobacco use...*  
4  
5 *However, Australia has had some big wins in improving public health*  
6  
7 *through regulation... Given that there is no safe way to consume tobacco*  
8  
9 *products, and that smoking-related expenses are at least \$12 billion a year,*  
10  
11 *taxes would have to double to cover the cost of health problems tobacco*  
12  
13 *creates. In that situation, the plain-packaging laws may be a necessary evil.*  
14  
15 *The Australian Financial Review, 17/08/2012, pg42; Editorial*  
16  
17  
18  
19

20 Industry calls for delays for implementation were covered in the media. For example,  
21 industry argued there would be supply issues as the proposed implementation timeline  
22 was too tight. The July 2012 deadline was subsequently extended to December 2012.  
23  
24  
25  
26  
27

28  
29 *SMOKERS face the prospect of being unable to purchase their preferred*  
30  
31 *brand of cigarettes when plain packaging is introduced, with the tobacco*  
32  
33 *industry warning it will not be able to supply the olive-green packs by next*  
34  
35 *year's July 1 deadline. The Australian, 5/08/2011, pg6; News*  
36  
37  
38

39 Industry tactics featured in a wave of stories, following a TV investigative journalism  
40 piece about industry funding of a “front-organisation”.  
41  
42  
43  
44  
45

46 *Senator Siewert recalled that the international tobacco companies spent*  
47  
48 *\$5million during the election campaign "using a front organisation the Alliance*  
49  
50 *of Australian Retailers in an attempt to prevent the introduction of plain*  
51  
52 *packaging laws". The Canberra Times, 20/11/2010, pg15, News*  
53  
54  
55  
56  
57

1  
2  
3 The likely effectiveness of plain packaging was a major source of debate, as was the  
4  
5 need to stand up to industry to pursue tobacco control policy for health.  
6  
7

8  
9 *"Let there be no mistake, big tobacco is fighting the government for one very*  
10  
11 *simple reason — because it knows, as we do, that plain packaging will work," Ms*  
12  
13 *Roxon [then Australian Attorney General] said. The Age,22/12/2011,pg1;News*  
14

15  
16  
17 *Globally, we need to present a strong and united front to tobacco industry*  
18  
19 *interference so we can finally end the pain, illness, suffering and costs caused by*  
20  
21 *tobacco. Herald Sun,28/05/2012,pg23;Editorial.*  
22  
23  
24  
25

## 26 **DISCUSSION**

27  
28 Media coverage of Australia's plain packaging was extensive and reflected the  
29  
30 protracted political debate, delays in implementation and legal challenges. Plain  
31  
32 packaging saw the tobacco industry step into the media in a way that had not been  
33  
34 seen in Australia for many years. Media coverage provided comprehensive coverage  
35  
36 of industry arguments, but it also covered critiques of industry's data, industry's  
37  
38 arguments and practices. Prior to the passing of the plain packaging bill the media  
39  
40 were covering a public health policy debate. Post legislation the media were covering  
41  
42 the litigation as it unfolded, and the uncertainty of outcome that involved. Despite the  
43  
44 apparent volume, much of the coverage was of low prominence, neutral and interest  
45  
46 largely dissipated upon implementation. When an opinion was present, there were  
47  
48 more articles that were supportive than opposing plain packaging.  
49  
50  
51  
52  
53  
54  
55  
56  
57  
58  
59  
60

1  
2  
3 The volume of articles peaked following the release of the draft Tobacco Plain  
4 Packaging Bill 2011 and consultation paper for public comment (7 April 2011). By  
5 the closing date (6 June 2011), the government had received 265 submissions, of  
6 which 99 supported the bill and 158 were opposed.<sup>47</sup> The arguments raised in the  
7 public consultation reflected those reported in the media; pro-policy arguments  
8 centred on health and social benefits, backed up by scientific evidence, whereas anti-  
9 policy arguments were more varied and included the ‘it won’t work’ rhetoric,  
10 economic impact on businesses, increase in illicit trade and infringements on  
11 consumer rights. Both sides of the argument were often discussed within the same  
12 article.  
13  
14  
15  
16  
17  
18  
19  
20  
21  
22  
23  
24  
25

26 Recent research on industry responses to plain packaging proposals in other  
27 jurisdictions have demonstrated that claims used in Australia, such as increased illicit  
28 trade and negative economic consequences, are being recycled despite evidence  
29 clearly demonstrating the falsehood of such claims.<sup>5, 38, 48, 49</sup> One study identified 173  
30 arguments against plain packaging in tobacco industry documents submitted during a  
31 plain packaging consultation process in the United Kingdom.<sup>49</sup> These tactics serve to  
32 overwhelm and to delay policy adoption and implementation, but do not hold up to  
33 scrutiny when challenged.<sup>4</sup> Lessons learned from Australia allowed the Canadian  
34 Government to combat this strategy during the consultation process by requiring that  
35 all submissions declare potential conflicts of interest and substantiate arguments with  
36 peer-reviewed evidence.<sup>50</sup> While these arguments continue to be perpetuated through  
37 the media, plain packaging laws have since passed in the UK, Ireland, NZ, Canada  
38 and France, with more likely to follow.  
39  
40  
41  
42  
43  
44  
45  
46  
47  
48  
49  
50  
51  
52  
53  
54  
55  
56  
57  
58  
59  
60

1  
2  
3 The second largest peak in articles corresponded with the High Court of Australia's  
4 rejection of the constitutional challenge to plain packaging legislation made by four  
5 tobacco companies (15 August 2012). This gave the green light for plain packaging to  
6 be implemented as planned. Relatively few articles were published once plain  
7 packaging was implemented. However, coverage of plain packaging increased again  
8 in June 2014, which corresponded with industry research claiming that plain  
9 packaging had failed. This news was reported in overseas newspapers but was quickly  
10 discredited in Australia with the use of a growing body of evidence demonstrating  
11 that plain packaging was effective.<sup>51</sup>  
12  
13  
14  
15  
16  
17  
18  
19  
20  
21  
22  
23

24 Nevertheless, the tobacco industry's use of misleading and unsubstantiated reports to  
25 generate negative media interest needs to be addressed. Recent research on the media  
26 reporting on illicit tobacco trade in the UK<sup>15</sup> and Canada<sup>36</sup> showed that industry  
27 continues to actively undermine public policy. They conclude that journalists need to  
28 scrutinise data sources more critically and hold tobacco industry reports to account by  
29 subjecting their data to independent peer review. However, the tobacco industry is  
30 aware of the high level of public distrust it attracts, and solicits other third-party  
31 organisations to disseminate its arguments,<sup>52</sup> and these organisations are not always  
32 forthcoming in declaring financial relationships with the tobacco industry.<sup>53</sup> In  
33 Australia, advocacy is core business for non-government public health bodies, with  
34 resources dedicated to maintaining contact with policy makers, critically reviewing  
35 published documents, producing evidence-based reports, issuing press releases and  
36 holding press conferences, and employing dedicated media and public relations staff  
37 to proactively (generate newsworthy story) and reactively (respond to journalists'  
38 request for comment on a story) give voice to tobacco control issues.<sup>25</sup> Advocacy has  
39  
40  
41  
42  
43  
44  
45  
46  
47  
48  
49  
50  
51  
52  
53  
54  
55  
56  
57  
58  
59  
60

1  
2  
3 been critical in shaping tobacco control news coverage for many years and this  
4  
5 experience is likely to have been essential in producing the timely and newsworthy  
6  
7 pro-plain packaging press releases that were reported in the media.<sup>25</sup> This was  
8  
9 facilitated by having evidence of bi-partisan and community support for the policy.<sup>40</sup>  
10

11  
12  
13 It is important to note that policy implementation was delayed, and industry tactics  
14  
15 did receive a high volume of coverage, albeit mostly neutral in tone. The power  
16  
17 structure of the media may contribute to the stance that is taken on whether the  
18  
19 dominant viewpoint aligns with industry or public health,<sup>26</sup> but such analysis was  
20  
21 beyond the scope of this study. By reporting tobacco industry tactics and mis-  
22  
23 information, the media is complicit in biasing the narrative around policy initiatives,  
24  
25 even if they also report alternative perspectives put forward by health advocates.  
26  
27 However, reports on tobacco industry tactics, such as policy setbacks, may help  
28  
29 consolidate the negative view of the industry by sophisticated audiences who already  
30  
31 view such tactics as unethical.<sup>19</sup> Thus ongoing advocacy efforts to keep tobacco issues  
32  
33 in the news beyond topical policy debates is essential for maintaining an educated and  
34  
35 pro-tobacco control audience ready for when industry strikes again.<sup>19, 25, 39</sup>  
36  
37  
38  
39  
40

41  
42 This study focused on newspaper articles and did not include other sources of media  
43  
44 influence (e.g. advertising). It may have missed articles not contained within the  
45  
46 database. The findings are specific to plain packaging and may not generalise to  
47  
48 media coverage of public health policy debates outside of tobacco control.  
49

50  
51 Nevertheless, this study demonstrates how large volumes of industry misinformation  
52  
53 can be challenged and thwarted using evidence-based public health advocacy.

54  
55 Countries seeking to implement plain packaging of tobacco should not be deterred by  
56  
57

1  
2  
3 the volume of news coverage of plain packaging debates or coverage of industry  
4 counter-arguments, but should be actively promoting the policy rationale and  
5 evidence for plain packaging in the media to counteract the response of the tobacco  
6 industry.  
7  
8  
9  
10  
11  
12

### 13 **ACKNOWLEDGEMENTS**

14  
15 None.  
16

### 17 **COMPETING INTERESTS**

18  
19 None.  
20  
21

### 22 **FUNDING**

23  
24 This research received no specific grant from any funding agency in the public,  
25 commercial or not-for-profit sectors.  
26  
27

### 28 **DATA SHARING STATEMENT**

29  
30 The dataset analysed during the current study is available from the corresponding  
31 author on reasonable request.  
32  
33  
34

### 35 **AUTHOR'S CONTRIBUTIONS**

36  
37 CM and KE conceptualised the study. KE and AB designed the study with input from  
38 CM and JD. AB collected and analysed the data and all authors contributed to  
39 interpretation of the results. CM drafted the manuscript, which was critically reviewed  
40 by all authors. The final version was approved by all authors.  
41  
42  
43  
44  
45  
46  
47  
48  
49  
50  
51  
52  
53  
54  
55  
56  
57  
58  
59  
60

**REFERENCES**

1. Australian Government Federal Register of Legislation. Tobacco Plain Packaging Act 2011. 2011 [accessed 26 Mar 2018]. Available from: [www.comlaw.gov.au/details/c2011a00148](http://www.comlaw.gov.au/details/c2011a00148).
2. Scollo M, Lindorff K, Coomber K, Bayly M, Wakefield M. Standardised packaging and new enlarged graphic health warnings for tobacco products in Australia—legislative requirements and implementation of the Tobacco Plain Packaging Act 2011 and the Competition and Consumer (Tobacco) Information Standard, 2011. *Tob Control*. 2015;24(Suppl 2):ii9.
3. Jaan Murphy. Australia's WTO plain cigarette packaging case: an update. Canberra: Parliament of Australia; 2014 Jul 8 [accessed 26 Mar 2018]. Available from: [www.aph.gov.au/About\\_Parliament/Parliamentary\\_Departments/Parliamentary\\_Library/FlagPost/2014/July/WTO\\_plain\\_cigarette\\_packaging\\_case](http://www.aph.gov.au/About_Parliament/Parliamentary_Departments/Parliamentary_Library/FlagPost/2014/July/WTO_plain_cigarette_packaging_case).
4. World Health Organization. Plain packaging of tobacco products: evidence, design and implementation Geneva: World Health Organization; 2016 [accessed 23 Jul 2018]. 86]. Available from: [www.who.int/tobacco/publications/industry/plain-packaging-tobacco-products/en/](http://www.who.int/tobacco/publications/industry/plain-packaging-tobacco-products/en/).
5. Daube M, Eastwood P, Mishima M, Peters M. Tobacco plain packaging: the Australian experience. *Respirology*. 2015;20(7):1001-3.
6. Wakefield MA, Brennan E, Durkin SJ, McLeod K, Smith KC. Still a burning issue: trends in the volume, content and population reach of newspaper coverage about tobacco issues. *Crit Public Health*. 2011;21(3):313-25.

- 1  
2  
3 7. Dunlop SM, Cotter T, Perez D, Chapman S. Tobacco in the news: associations  
4 between news coverage, news recall and smoking-related outcomes in a sample  
5 of Australian smokers and recent quitters. *Health Educ Res.* 2012;27(1):160-71.  
6  
7
- 8  
9 8. McCombs ME, Shaw DL. The agenda-setting function of mass media. *Public*  
10  
11  
12 *Opin Q.* 1972;36(2):176-87.  
13
- 14 9. Wallack L, Dorfman L. Media advocacy: a strategy for advancing policy and  
15 promoting health. *Health Educ Q.* 1996;23(3):293-317.  
16  
17
- 18 10. McCombs ME, Shaw DL. The evolution of agenda-setting research: twenty-five  
19 years in the marketplace of ideas. *Journal of Communication.* 1993;43(2):58-67.  
20  
21
- 22 11. Entman RM. Framing: toward clarification of a fractured paradigm. *Journal of*  
23  
24 *Communication.* 1993;43(4):51-8.  
25
- 26 12. Clegg-Smith K, Terry-McElrath Y, Wakefield M, Durrant R. Media advocacy  
27 and newspaper coverage of tobacco issues: a comparative analysis of 1 year's  
28 print news in the United States and Australia. *Nicotine Tob Res.* 2005;7(2):289-  
29  
30  
31  
32  
33  
34 99.
- 35 13. He S, Shen Q, Yin X, Xu L, Lan X. Newspaper coverage of tobacco issues: an  
36 analysis of print news in Chinese cities, 2008-2011. *Tob Control.*  
37  
38  
39  
40  
41  
42  
43  
44  
45 2014;23(4):345-52.
- 46 14. McGee R, Bang S, Marsh L. Newspaper coverage of tobacco control in New  
47  
48  
49  
50  
51  
52  
53  
54  
55  
56  
57  
58  
59  
60 Zealand. *Aust N Z J Public Health.* 2014;38(3):265-9.
15. Rowell A, Evans-Reeves K, Gilmore AB. Tobacco industry manipulation of data  
on and press coverage of the illicit tobacco trade in the UK. *Tob Control.*  
2014;23(e1):e35-e43.
16. Menashe CL. The power of a frame: an analysis of newspaper coverage of  
tobacco issues-United States, 1985-1996. *J Health Commun.* 1998;3(4):307-25.



- 1  
2  
3 17. Niederdeppe J, Farrelly MC, Thomas KY, Wenter D, Weitzenkamp D.  
4  
5 Newspaper coverage as indirect effects of a health communication intervention:  
6  
7 the florida tobacco control program and youth smoking. *Communication*  
8  
9 *Research*. 2007;34(4):382-405.  
10
- 11 18. Davis RM, Gilpin EA, Loken B, Viswanath K, Wakefield MA. The role of the  
12  
13 media in promoting and reducing tobacco use. In *NCI Tobacco Control*  
14  
15 *Monograph Series No.19 (NIH Publication. No 07-6242.200)*. Bethesda, MD: US  
16  
17 Department of Health and Human Services; 2008.  
18
- 19 19. Durrant R, Wakefield M, McLeod K, Clegg-Smith K, Chapman S. Tobacco in  
20  
21 the news: an analysis of newspaper coverage of tobacco issues in Australia, 2001.  
22  
23 *Tob Control*. 2003;12(suppl 2):75-81.  
24
- 25 20. Long M, Slater MD, Lysengen L. US news media coverage of tobacco control  
26  
27 issues. *Tob Control*. 2006;15(5):367-72.  
28
- 29 21. Stillman FA, Cronin KA, Evans WD, Ulasevich A. Can media advocacy  
30  
31 influence newspaper coverage of tobacco: measuring the effectiveness of the  
32  
33 American stop smoking intervention study's (ASSIST) media advocacy  
34  
35 strategies. *Tob Control*. 2001;10(2):137-44.  
36  
37
- 38 22. Champion D, Chapman S. Framing pub smoking bans: an analysis of Australian  
39  
40 print news media coverage, March 1996–March 2003. *J Epidemiol Community*  
41  
42 *Health*. 2005;59(8):679-84.  
43  
44
- 45 23. Freeman B. Tobacco plain packaging legislation: a content analysis of  
46  
47 commentary posted on Australian online news. *Tob Control*. 2011;20(5):361-6.  
48  
49
- 50 24. Thrasher JF, Kim S-H, Rose I, Craft M-K. Media coverage of smoke-free  
51  
52 policies after their innovation. *J Health Commun*. 2015;20(3):297-305.  
53  
54  
55  
56  
57  
58  
59  
60

- 1  
2  
3 25. Wakefield MA, Brennan E, Durkin SJ, McLeod K, Smith KC. Making news: the  
4 appearance of tobacco control organizations in newspaper coverage of tobacco  
5 control issues. *AJHP*. 2012;26(3):166-71.  
6  
7
- 8  
9 26. Mercille J. Media coverage of alcohol issues: a critical political economy  
10 framework—a case study from Ireland. *Int J Environ Res Public Health*.  
11 2017;14(6):650.  
12  
13
- 14  
15 27. Wackowski OA, Lewis MJ, Hrywna M. Banning smoking in New Jersey  
16 casinos—a content analysis of the debate in print media. *Substance Use &*  
17 *Misuse*. 2011;46(7):882-8.  
18  
19
- 20  
21 28. Fahy D, Trench B, Clancy L. Communicating contentious health policy: lessons  
22 from Ireland’s workplace smoking ban. *Health Promot Pract*. 2012;13(3):331-8.  
23  
24
- 25  
26 29. Kenterelidou C. Framing public health issues: the case of smoking ban in Greece,  
27 public health policy framing equals healthy framing of public policy? *Journal of*  
28 *Communication in Healthcare*. 2012;5(2):116-28.  
29  
30
- 31  
32 30. Moshrefzadeh A, Rice W, Pederson A, Okoli C. A content analysis of media  
33 coverage of the introduction of a smoke-free bylaw in Vancouver parks and  
34 beaches. *Int J Environ Res Public Health*. 2013;10(9):4444-53.  
35  
36
- 37  
38 31. McDaniel PA, Offen N, Yerger V, Forsyth S, Malone RE. “Tired of watching  
39 customers walk out the door because of the smoke”: a content analysis of media  
40 coverage of voluntarily smokefree restaurants and bars. *BMC Public Health*.  
41 2015;15(1):761.  
42  
43
- 44  
45 32. Harris JK, Shelton SC, Moreland-Russell S, Luke DA. Tobacco coverage in print  
46 media: the use of timing and themes by tobacco control supporters and opposition  
47 before a failed tobacco tax initiative. *Tob Control*. 2010;19(1):37-43.  
48  
49  
50  
51  
52  
53  
54  
55  
56  
57  
58  
59  
60

- 1  
2  
3 33. Thrasher JF, Kim S-H, Rose I, Navarro A, Craft M-K, Davis KJ, Biggers S. Print  
4 media coverage around failed and successful tobacco tax initiatives: the south  
5 Carolina experience. *AJHP*. 2014;29(1):29-36.  
6  
7  
8  
9 34. Myers AE, Southwell BG, Ribisl KM, Moreland-Russell S, Lytle LA. Setting the  
10 agenda for a healthy retail environment: content analysis of US newspaper  
11 coverage of tobacco control policies affecting the point of sale, 2007–2014. *Tob*  
12 *Control*. 2017;26(4):406-14.  
13  
14  
15 35. Miller CL, Hill DJ, Quester PG, Hiller JE. Response of mass media, tobacco  
16 industry and smokers to the introduction of graphic cigarette pack warnings in  
17 Australia. *Eur J Public Health*. 2009;19(6):644-9.  
18  
19  
20 36. Smith J, Thompson S, Lee K. Death and taxes: the framing of the causes and  
21 policy responses to the illicit tobacco trade in Canadian newspapers. *Cogent*  
22 *Social Sciences*. 2017;3(1):1325054.  
23  
24  
25 37. Yates K, Friedman K, Slater MD, Berman M, Paskett E, Ferketich AK. A content  
26 analysis of electronic cigarette portrayal in newspapers. *Tobacco Regulatory*  
27 *Science*. 2015;1(1):94-102.  
28  
29  
30 38. Waa AM, Hoek J, Edwards R, Maclaurin J. Analysis of the logic and framing of  
31 a tobacco industry campaign opposing standardised packaging legislation in New  
32 Zealand. *Tob Control*. 2016;26(6):629.  
33  
34  
35 39. MacKenzie R, Chapman S. Generating news media interest in tobacco control;  
36 challenges in an advanced policy environment. *Health Promot J Austr*.  
37 2012;23(2):92-6.  
38  
39  
40 40. Scollo MM, Freeman B, Greenhalg EM. 11.10 Packaging as promotion: evidence  
41 for and effects of plain packaging. In Scollo MM and Winstanley MH [editors].  
42 *Tobacco in Australia: Facts and issues*. Melbourne: Cancer Council Victoria;  
43  
44  
45  
46  
47  
48  
49  
50  
51  
52  
53  
54  
55  
56  
57  
58  
59  
60

- 2016 [updated Sep 2017; accessed 23 Mar 2018]. Available from:  
[www.tobaccoaustralia.org.au/chapter-11-advertising/11-10-packaging-as-promotion](http://www.tobaccoaustralia.org.au/chapter-11-advertising/11-10-packaging-as-promotion).
41. National Preventative Health Taskforce. Australia: The healthiest country by 2020. A discussion paper prepared by the National Preventative Health Taskforce Canberra: Australian Government; 2018 [accessed 23 Jul 2018]. Available from:  
<http://webarchive.nla.gov.au/gov/20160923060416/http://www.preventativehealth.org.au/internet/preventativehealth/publishing.nsf/Content/discussion-healthiest>.
42. Cancer Council. Timeline, international developments & major news stories. [accessed 26 Mar 2018]. Available from:  
[www.cancervic.org.au/plainfacts/browse.asp?ContainerID=timelineandinternationaldevelopments](http://www.cancervic.org.au/plainfacts/browse.asp?ContainerID=timelineandinternationaldevelopments).
43. Australian Government Department of Health. Introduction of tobacco plain packaging in Australia. 2014 [updated 23 Oct 2017; accessed 26 Mar 2018]. Available from:  
[www.health.gov.au/internet/main/publishing.nsf/Content/tobacco-plain](http://www.health.gov.au/internet/main/publishing.nsf/Content/tobacco-plain).
44. Roy Morgan. Australian Newspaper Readership, 12 months to June 2014 2014 [accessed 22 Aug 2014]. Available from:  
<http://www.roymorgan.com/industries/media/readership/newspaper-readership>.
45. Clegg Smith K, Wakefield M, Siebel C, Szczypka G, Slater S, Terry-McElrath Y, Emery S, Chaloupka FJ. Coding the news: the development of a methodological framework for coding and analyzing newspaper coverage of tobacco issues. ImpacTeen Research Paper Series, 21. 2002.
46. Paul Barry. Up in smoke. The Australian's exclusive story on plain packaging is just plain wrong. In: Julie Adams, editor. Media Watch: Australian Broadcasting

- 1  
2  
3 Corporation; 2014 Jun 16 [accessed 26 Mar 2018]. Available from:  
4  
5 <http://www.abc.net.au/mediawatch/transcripts/s4026465.htm>.  
6  
7 47. Australian Government Department of Health and Ageing. Public consultation on  
8  
9 plain packaging of cigarettes: National Library of Australia; 2011 [accessed 23  
10  
11 Jul 2018]. Available from:  
12  
13 [http://webarchive.nla.gov.au/gov/20140215002600/http://www.health.gov.au/inte](http://webarchive.nla.gov.au/gov/20140215002600/http://www.health.gov.au/internet/yourhealth/publishing.nsf/Content/plainpack-tobacco)  
14  
15 [rnet/yourhealth/publishing.nsf/Content/plainpack-tobacco](http://webarchive.nla.gov.au/gov/20140215002600/http://www.health.gov.au/internet/yourhealth/publishing.nsf/Content/plainpack-tobacco).  
16  
17 48. Ulucanlar S, Fooks GJ, Hatchard JL, Gilmore AB. Representation and  
18  
19 misrepresentation of scientific evidence in contemporary tobacco regulation: a  
20  
21 review of tobacco industry submissions to the UK Government consultation on  
22  
23 standardised packaging. PLoS Med. 2014;11(3):e1001629.  
24  
25 49. Lie JLY, Fooks G, de Vries NK, Heijndijk SM, Willemsen MC. Can't see the  
26  
27 woods for the trees: exploring the range and connection of tobacco industry  
28  
29 argumentation in the 2012 UK standardised packaging consultation. Tob Control.  
30  
31 2017;tobaccocontrol-2017.  
32  
33 50. Smith J, Lee K. Protecting the plain packaging consultation from tobacco  
34  
35 industry interference. CMAJ. 2016;188(14):E340-E1.  
36  
37 51. Daube M, Chapman S. The Australian's dissembling campaign on tobacco plain  
38  
39 packaging. Med J Aust. 2014;201(4):191-2.  
40  
41 52. Vittiglia A, Greenhalgh E. 10A.6 Mechanisms of influence-media relations. In  
42  
43 Scollo MM and Winstanley MH [editors]. Tobacco in Australia: Facts and issues.  
44  
45 Melbourne: Cancer Council Victoria; 2018 [accessed 23 Jul 2018]. Available  
46  
47 from: [www.tobaccoinaustralia.org.au/chapter-10-tobacco-industry/10a-6-the-](http://www.tobaccoinaustralia.org.au/chapter-10-tobacco-industry/10a-6-the-mechanisms-of-influence-media-relations)  
48  
49 [mechanisms-of-influence-media-relations](http://www.tobaccoinaustralia.org.au/chapter-10-tobacco-industry/10a-6-the-mechanisms-of-influence-media-relations).  
50  
51  
52  
53  
54  
55  
56  
57  
58  
59  
60

- 1  
2  
3 53. Hatchard JL, Fooks GJ, Gilmore AB. Standardised tobacco packaging: a health  
4 policy case study of corporate conflict expansion and adaptation. BMJ open.  
5  
6  
7 2016;6(10):e012634.  
8  
9  
10  
11  
12  
13  
14  
15  
16  
17  
18  
19  
20  
21  
22  
23  
24  
25  
26  
27  
28  
29  
30  
31  
32  
33  
34  
35  
36  
37  
38  
39  
40  
41  
42  
43  
44  
45  
46  
47  
48  
49  
50  
51  
52  
53  
54  
55  
56  
57  
58  
59  
60

For peer review only

1  
2  
3  
4  
5  
6  
7  
8  
9  
10  
11  
12  
13  
14  
15  
16  
17  
18  
19  
20  
21  
22  
23  
24  
25  
26  
27  
28  
29  
30  
31  
32  
33  
34  
35  
36  
37  
38  
39  
40  
41  
42  
43  
44  
45  
46  
47  
48  
49  
50  
51  
52  
53  
54  
55  
56  
57  
58  
59  
60

**FIGURE 1. Volume of print media articles on plain packaging, Jan 2008 - Nov 2014**

For peer review only

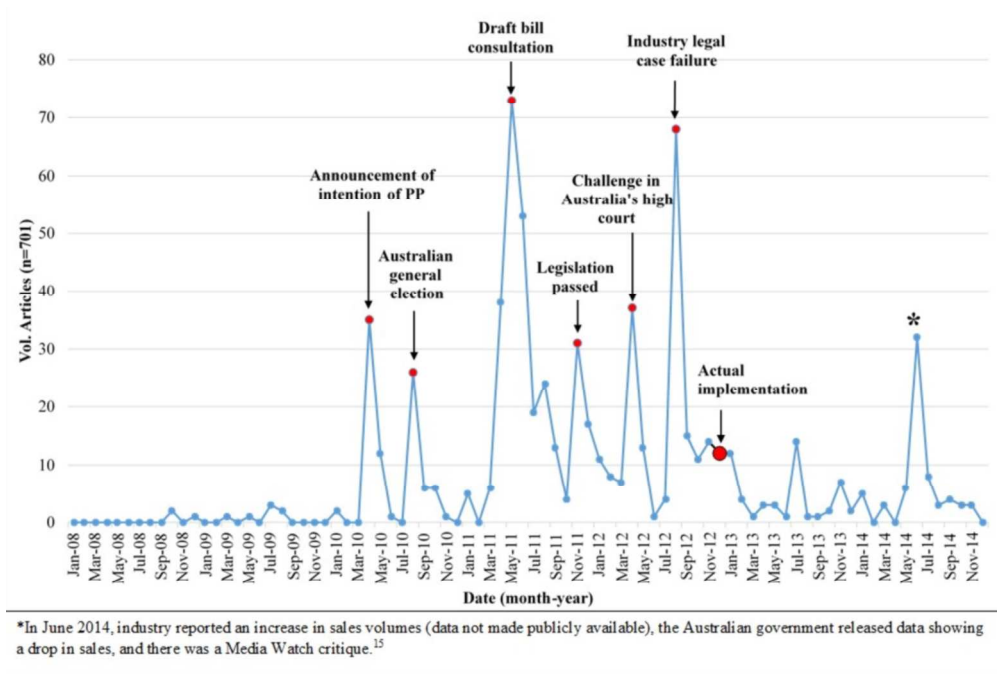

Figure 1. Volume of print media articles on plain packaging, Jan 2008 - Nov 2014

342x228mm (300 x 300 DPI)



STROBE Statement—Checklist of items that should be included in reports of *cross-sectional studies*

|                              | Item No | Recommendation                                                                                                                                                                                               |    |
|------------------------------|---------|--------------------------------------------------------------------------------------------------------------------------------------------------------------------------------------------------------------|----|
| <b>Title and abstract</b>    | 1       | (a) Indicate the study's design with a commonly used term in the title or the abstract                                                                                                                       | P1 |
|                              |         | (b) Provide in the abstract an informative and balanced summary of what was done and what was found                                                                                                          | P3 |
| <b>Introduction</b>          |         |                                                                                                                                                                                                              |    |
| Background/rationale         | 2       | Explain the scientific background and rationale for the investigation being reported                                                                                                                         | P4 |
| Objectives                   | 3       | State specific objectives, including any prespecified hypotheses                                                                                                                                             | P4 |
| <b>Methods</b>               |         |                                                                                                                                                                                                              |    |
| Study design                 | 4       | Present key elements of study design early in the paper                                                                                                                                                      | P5 |
| Setting                      | 5       | Describe the setting, locations, and relevant dates, including periods of recruitment, exposure, follow-up, and data collection                                                                              | P5 |
| Participants                 | 6       | (a) Give the eligibility criteria, and the sources and methods of selection of participants                                                                                                                  | na |
| Variables                    | 7       | Clearly define all outcomes, exposures, predictors, potential confounders, and effect modifiers. Give diagnostic criteria, if applicable                                                                     | P5 |
| Data sources/<br>measurement | 8*      | For each variable of interest, give sources of data and details of methods of assessment (measurement). Describe comparability of assessment methods if there is more than one group                         | P5 |
| Bias                         | 9       | Describe any efforts to address potential sources of bias                                                                                                                                                    | na |
| Study size                   | 10      | Explain how the study size was arrived at                                                                                                                                                                    | na |
| Quantitative variables       | 11      | Explain how quantitative variables were handled in the analyses. If applicable, describe which groupings were chosen and why                                                                                 | na |
| Statistical methods          | 12      | (a) Describe all statistical methods, including those used to control for confounding                                                                                                                        | na |
|                              |         | (b) Describe any methods used to examine subgroups and interactions                                                                                                                                          | na |
|                              |         | (c) Explain how missing data were addressed                                                                                                                                                                  | na |
|                              |         | (d) If applicable, describe analytical methods taking account of sampling strategy                                                                                                                           | na |
|                              |         | (e) Describe any sensitivity analyses                                                                                                                                                                        | na |
| <b>Results</b>               |         |                                                                                                                                                                                                              |    |
| Participants                 | 13*     | (a) Report numbers of individuals at each stage of study—eg numbers potentially eligible, examined for eligibility, confirmed eligible, included in the study, completing follow-up, and analysed            | na |
|                              |         | (b) Give reasons for non-participation at each stage                                                                                                                                                         | na |
|                              |         | (c) Consider use of a flow diagram                                                                                                                                                                           | na |
| Descriptive data             | 14*     | (a) Give characteristics of study participants (eg demographic, clinical, social) and information on exposures and potential confounders                                                                     | na |
|                              |         | (b) Indicate number of participants with missing data for each variable of interest                                                                                                                          | na |
| Outcome data                 | 15*     | Report numbers of outcome events or summary measures                                                                                                                                                         | P6 |
| Main results                 | 16      | (a) Give unadjusted estimates and, if applicable, confounder-adjusted estimates and their precision (eg, 95% confidence interval). Make clear which confounders were adjusted for and why they were included | na |
|                              |         | (b) Report category boundaries when continuous variables were categorized                                                                                                                                    | na |
|                              |         | (c) If relevant, consider translating estimates of relative risk into absolute risk for                                                                                                                      | na |

|                          |    |                                                                                                                                                                            |       |
|--------------------------|----|----------------------------------------------------------------------------------------------------------------------------------------------------------------------------|-------|
|                          |    | a meaningful time period                                                                                                                                                   |       |
| Other analyses           | 17 | Report other analyses done—eg analyses of subgroups and interactions, and sensitivity analyses                                                                             | na    |
| <b>Discussion</b>        |    |                                                                                                                                                                            |       |
| Key results              | 18 | Summarise key results with reference to study objectives                                                                                                                   | P9    |
| Limitations              | 19 | Discuss limitations of the study, taking into account sources of potential bias or imprecision. Discuss both direction and magnitude of any potential bias                 | P10   |
| Interpretation           | 20 | Give a cautious overall interpretation of results considering objectives, limitations, multiplicity of analyses, results from similar studies, and other relevant evidence | P10   |
| Generalisability         | 21 | Discuss the generalisability (external validity) of the study results                                                                                                      | P9-10 |
| <b>Other information</b> |    |                                                                                                                                                                            |       |
| Funding                  | 22 | Give the source of funding and the role of the funders for the present study and, if applicable, for the original study on which the present article is based              | na    |

\*Give information separately for exposed and unexposed groups.

**Note:** An Explanation and Elaboration article discusses each checklist item and gives methodological background and published examples of transparent reporting. The STROBE checklist is best used in conjunction with this article (freely available on the Web sites of PLoS Medicine at <http://www.plosmedicine.org/>, Annals of Internal Medicine at <http://www.annals.org/>, and Epidemiology at <http://www.epidem.com/>). Information on the STROBE Initiative is available at [www.strobe-statement.org](http://www.strobe-statement.org).
